# Supplementary material for: Oxone®-Mediated TEMPO-Oxidized Cellulose Nanomaterial Ultrafiltration and Dialysis Mixed-Matrix Hollow Fiber Membranes
Source: MDPI journal article supplement (doi:10.3390/polym12061348), 2020-06-15
Supplement: s1 [file s1]

The composition of the three different membranes formulated with the solution made from the sonication protocol (1 wt.% OTO-CNMs, 9 wt.% CTA, and 90 wt.% NMP) for casting and further characterization can be identified in Supplemental Supplemental Table S below.

**Supplemental Table S1:** The compositions of OTO-CNM/CTA membranes based on wt.% for Form I to Form II

| Membrane Sample | OTO-CNM Form I (wt.%) | OTO-CNM Form II (wt.%) | CTA (wt.%) | NMP (wt.%) |
|-----------------|-----------------------|------------------------|------------|------------|
| (a) Form I      | 1.0                   | 0.0                    | 9.0        | 90.0       |
| (b) 50/50       | 0.5                   | 0.5                    | 9.0        | 90.0       |
| (c) Form II     | 0.0                   | 1.0                    | 9.0        | 90.0       |
| (d) CTA         | 0.0                   | 0.0                    | 10.0       | 90.0       |

Once the final combination of membrane materials was completed, the mixture was sealed in the reagent bottle to avoid the evaporation of the solvent. The bottle was continuously mixed in a bottle roller over 72–120 h at room temperature before casting.

Sieving coefficients plotted logarithmically in Figure 3 can be seen in the Supplemental Table 2 below.

**Supplemental Table S2:** Membrane Sieving Coefficient Information

| Sample   | Molecular Weight (Dalton) | Control         | Form I          | Form II         | 50/50           |
|----------|---------------------------|-----------------|-----------------|-----------------|-----------------|
| BSA      | 66000                     | $0.13 \pm 0.07$ | $0.19 \pm 0.11$ | $0.19 \pm 0.10$ | $0.31 \pm 0.01$ |
| Lysozyme | 14000                     | $0.88 \pm 0.06$ | $0.75 \pm 0.03$ | $0.68 \pm 0.05$ | $0.77 \pm 0.01$ |
| Urea     | 60                        | $1.03 \pm 0.03$ | $1.06 \pm 0.05$ | $0.99 \pm 0.04$ | $1.03 \pm 0.03$ |
